# Supplementary material for: Impact of N-donor auxiliary ligands on three new Co(ii)-based coordination polymers with symmetrical tetracarboxylate ligands: a magnetism study
Source: Royal Society of Chemistry journal article supplement (doi:10.1039/d3nj03772j), 2023-01-01
Supplement: d3nj03772j1.pdf [file d3nj03772j1.pdf]

## **Impact of N-donor auxiliary ligands on three new Co(II)-based coordination polymers with symmetrical tetracarboxylate ligands: magnetism study**

Xiaoyu Zhang<sup>a</sup>, Tianrui Qin<sup>a</sup>, Ruifang Xiang<sup>a</sup>, Xiuyan Dong<sup>a,\*</sup>, Hiroshi Sakiyama<sup>b,\*</sup>, Mohd. Muddassir<sup>c</sup>, and Ying Pan<sup>d,\*</sup>

<sup>a</sup>*School of Chemistry and Chemical Engineering, Lanzhou Jiaotong University, Lanzhou 730070, P. R. China*

<sup>b</sup>*Department of Science, Faculty of Science, Yamagata University, 1-4-12 Kojirakawa, Yamagata 990-8560, Japan*

<sup>c</sup>*Department of Chemistry, College of Sciences, King Saud University, Riyadh 11451, Saudi Arabia*

<sup>d</sup>*The First Dongguan Affiliated Hospital, Guangdong Medical University, Dongguan 523700, China*

\*Email: [dongxy@mail.lzjtu.cn](mailto:dongxy@mail.lzjtu.cn); [saki@sci.kj.yamagata-u.ac.jp](mailto:saki@sci.kj.yamagata-u.ac.jp) and [panying@gdmu.edu.cn](mailto:panying@gdmu.edu.cn)

**Correspondence:** Xiuyan Dong, School of Chemistry and Chemical Engineering, Lanzhou Jiaotong University, Lanzhou 730070, P. R. China.

Email: [dongxy@mail.lzjtu.cn](mailto:dongxy@mail.lzjtu.cn)

## Contents

**Figure S1.** The coordination modes of **L** in **1-3**.

**Figure S2.** Simulated and observed PXRD patterns of CPs **1-3**.

**Figure S3.** Infrared spectra of CPs **1-3**.

**Figure S4.** The TG curves of CPs **1-3**.

**Table S1.** Crystal data and structure refinement for CPs **1-3**.

**Table S2.** Selected Bond Lengths (Å) and angles (°) for CPs **1-3**.

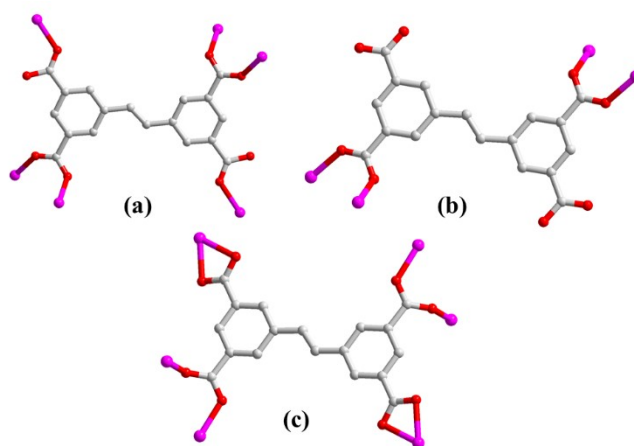

**Figure S1.** The coordination modes of **L** in **1-3**.

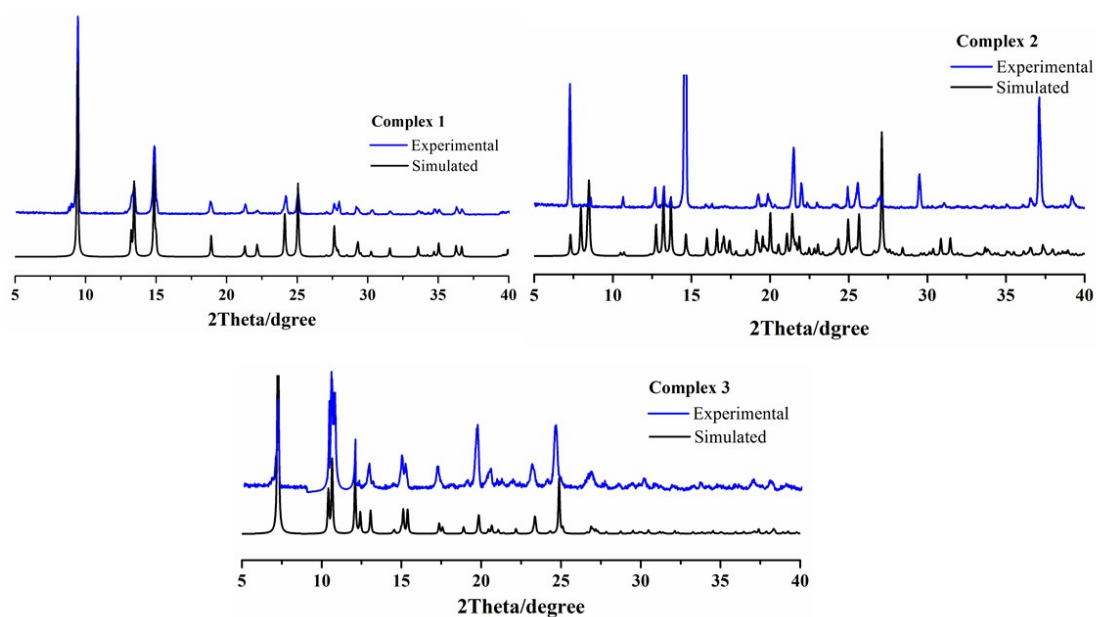

**Figure S2.** Simulated and observed PXRD patterns of CPs **1-3**.

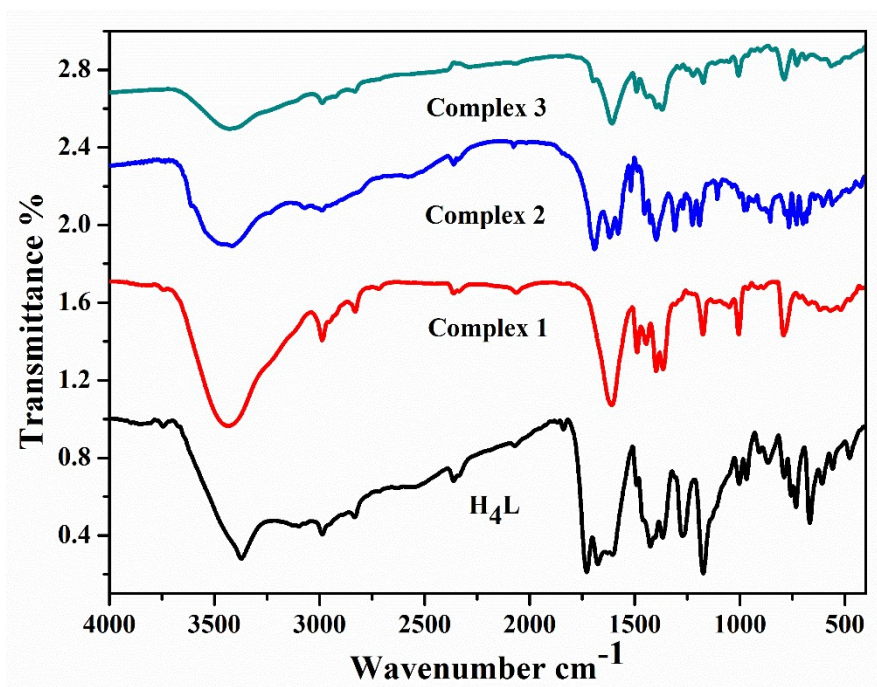

**Figure S3.** Infrared spectra of CPs 1-3.

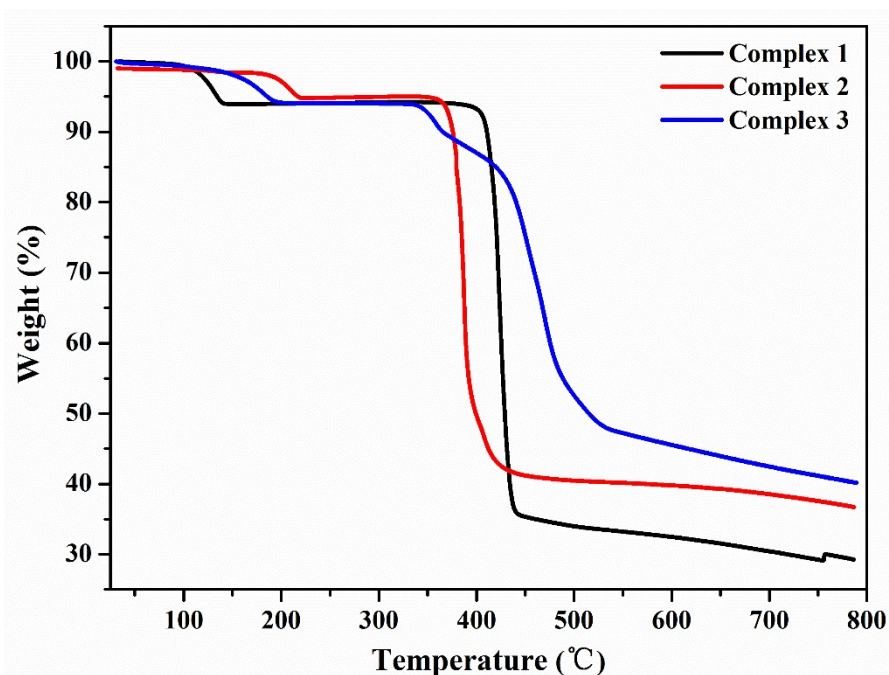

**Figure S4.** The TG curves of CPs 1-3.

**Table S1.** Crystal data and structure refinement for CPs 1-3.

| Complex           | 1                   | 2                         | 3                           |
|-------------------|---------------------|---------------------------|-----------------------------|
| Empirical formula | $C_{18}H_{10}CoO_8$ | $C_{39}H_{28}CoN_2O_{14}$ | $C_{37}H_{26}Co_2N_4O_{14}$ |
| Formula weight    | 413.19              | 807.56                    | 868.48                      |
| Temperature (K)   | 298                 | 293                       | 296                         |

|                                                    |                                                    |                                                      |                                                     |
|----------------------------------------------------|----------------------------------------------------|------------------------------------------------------|-----------------------------------------------------|
| Wavelength (Å)                                     | 1.54184                                            | 1.54184                                              | 0.710730                                            |
| Crystal system                                     | Monoclinic                                         | Triclinic                                            | Triclinic                                           |
| Space group                                        | $P2_1/c$                                           | $P\bar{1}$                                           | $P\bar{1}$                                          |
| Unit cell dimension                                |                                                    |                                                      |                                                     |
| $a$ (Å)                                            | 4.4234(2)                                          | 11.6020(7)                                           | 8.0125(7)                                           |
| $b$ (Å)                                            | 13.3689(5)                                         | 12.0259(8)                                           | 9.6714(8)                                           |
| $c$ (Å)                                            | 13.1637(5)                                         | 14.2958(9)                                           | 13.1079(11)                                         |
| $\alpha$ (°)                                       | 90                                                 | 68.618(6)                                            | 109.886(2)                                          |
| $\beta$ (°)                                        | 90.391(3)                                          | 66.501(6)                                            | 90.701(3)                                           |
| $\gamma$ (°)                                       | 90                                                 | 88.714(5)                                            | 112.409(3)                                          |
| $V$ (Å <sup>3</sup> )                              | 778.43(5)                                          | 1685.6(2)                                            | 871.22(13)                                          |
| $Z$                                                | 2                                                  | 2                                                    | 1                                                   |
| $D_{\text{calc}}$ (Mg m <sup>-3</sup> )            | 1.763                                              | 1.591                                                | 1.655                                               |
| $\mu$ (mm <sup>-1</sup> )                          | 9.11                                               | 4.69                                                 | 1.03                                                |
| $F(000)$                                           | 418                                                | 830                                                  | 442                                                 |
| Crystal size (mm)                                  | 0.07 × 0.05 × 0.04                                 | 0.12 × 0.12 × 0.11                                   | 0.08 × 0.06 × 0.03                                  |
| $\theta$ range (°)                                 | 4.7 to 75.1                                        | 3.7 to 71.1                                          | 2.4 to 27.5                                         |
| Index ranges                                       | -3 ≤ $h$ ≤ 5,<br>-15 ≤ $k$ ≤ 15,<br>-15 ≤ $l$ ≤ 15 | -12 ≤ $h$ ≤ 13,<br>-13 ≤ $k$ ≤ 14,<br>-17 ≤ $l$ ≤ 17 | -8 ≤ $h$ ≤ 10,<br>-12 ≤ $k$ ≤ 11,<br>-16 ≤ $l$ ≤ 17 |
| Reflections collected                              | 4196                                               | 10881                                                | 7684                                                |
| Independent reflection                             | 1369 [ $R_{\text{int}} = 0.043$ ]                  | 6027 [ $R_{\text{int}} = 0.037$ ]                    | 3949 [ $R_{\text{int}} = 0.026$ ]                   |
| Data/restraints/parameters                         | 1369/0/125                                         | 6027/156/509                                         | 3949/140/309                                        |
| Final $R_1$ , $wR_2$ indices                       | 0.037, 0.096                                       | 0.058, 0.147                                         | 0.041, 0.104                                        |
| $[I > 2\sigma(I)]$                                 |                                                    |                                                      |                                                     |
| $R_1$ , $wR_2$ indices (all data)                  | 0.049, 0.101                                       | 0.029, 0.157                                         | 0.049, 0.111                                        |
| GOF                                                | 1.05                                               | 1.10                                                 | 1.02                                                |
| $\Delta\rho_{\text{max,min}}$ (e Å <sup>-3</sup> ) | 0.42/-0.60                                         | 1.01/-0.60                                           | 0.78/-0.75                                          |

**Table S2.** Selected Bond Lengths (Å) and angles (°) for CPs 1-3.

| Complex 1     |             |               |             |          |             |
|---------------|-------------|---------------|-------------|----------|-------------|
| Co1—O1#1      | 2.1464 (17) | Co1—O2#3      | 2.0433 (18) | Co1—O3#4 | 2.0974 (18) |
| Co1—O1#2      | 2.1464 (18) | Co1—O2        | 2.0432 (18) | Co1—O3#5 | 2.0974 (18) |
| O1#2—Co1—O1#1 | 180.0       | O2—Co1—O3#4   | 94.57 (8)   |          |             |
| O2#3—Co1—O1#1 | 92.93 (7)   | O2#3—Co1—O3#4 | 85.43 (8)   |          |             |
| O2—Co1—O1#2   | 92.93 (7)   | O3#4—Co1—O1#1 | 88.18 (7)   |          |             |

|               |           |               |           |
|---------------|-----------|---------------|-----------|
| O2—Co1—O1#1   | 87.07 (7) | O3#5—Co1—O1#2 | 88.18 (7) |
| O2#3—Co1—O1#2 | 87.07 (7) | O3#5—Co1—O1#1 | 91.82 (7) |
| O2—Co1—O2#3   | 180.0     | O3#4—Co1—O1#2 | 91.82 (7) |
| O2#3—Co1—O3#5 | 94.57 (8) | O3#4—Co1—O3#5 | 180.0     |
| O2—Co1—O3#5   | 85.43 (8) |               |           |

Symmetry codes for #1  $-x, y+1/2, -z+1/2$ ; #2  $x, -y+3/2, z+1/2$ ; #3  $-x, -y+2, -z+1$ ; #4  $-x+1, -y+2, -z+1$ ; #5  $x-1, y, z$ ; #6  $-x, y-1/2, -z+1/2$ ; #7  $x+1, y, z$ ; #8  $-x+2, -y+1, -z+1$ .

### Complex 2

|              |             |              |             |         |           |
|--------------|-------------|--------------|-------------|---------|-----------|
| Co1—O14      | 2.048 (3)   | Co1—O1#1     | 2.097 (3)   | Co1—N1  | 2.144 (3) |
| Co1—O2       | 2.051 (3)   | Co1—N2       | 2.100 (3)   | Co1—O13 | 2.288 (3) |
| O14—Co1—O2   | 95.62 (11)  | O1#1—Co1—N1  | 86.40 (12)  |         |           |
| O14—Co1—O1#1 | 94.18 (12)  | N2—Co1—N1    | 78.45 (11)  |         |           |
| O2—Co1—O1#1  | 106.62 (12) | O14—Co1—O13  | 82.99 (12)  |         |           |
| O14—Co1—N2   | 173.26 (11) | O2—Co1—O13   | 77.53 (12)  |         |           |
| O2—Co1—N2    | 91.02 (11)  | O1#1—Co1—O13 | 175.24 (11) |         |           |
| O1#1—Co1—N2  | 85.03 (11)  | N2—Co1—O13   | 97.33 (12)  |         |           |
| O14—Co1—N1   | 94.82 (11)  | N1—Co1—O13   | 90.02 (12)  |         |           |
| O2—Co1—N1    | 162.62 (11) |              |             |         |           |

Symmetry codes for #1  $-x+2, -y, -z+2$ ; #2  $-x+3, -y, -z+1$ .

### Complex 3

|              |            |               |          |          |            |
|--------------|------------|---------------|----------|----------|------------|
| Co1—O1       | 2.0358(16) | Co1—O1W       | 2.095(2) | Co1—O3#2 | 2.1242(16) |
| Co1—O2#1     | 2.0641(18) | Co1—N1        | 2.115(9) | Co1—O4#2 | 2.2736(18) |
| O1—Co1—O2#1  | 94.63(7)   | O1W—Co1—O3#2  | 88.10(8) |          |            |
| O1—Co1—O1W   | 81.12(8)   | N1—Co1—O3#2   | 93.0(3)  |          |            |
| O2#1—Co1—O1W | 173.13(8)  | O1—Co1—O4#2   | 88.11(6) |          |            |
| O1—Co1—N1    | 119.1(3)   | O2#1—Co1—O4#2 | 90.86(7) |          |            |
| O2#1—Co1—N1  | 91.60(19)  | O1W—Co1—O4#2  | 94.37(9) |          |            |

|               |           |               |          |
|---------------|-----------|---------------|----------|
| O1W—Co1—N1    | 85.8(2)   | N1—Co1—O4#2   | 152.3(3) |
| O1—Co1—O3#2   | 144.88(7) | O3#2—Co1—O4#2 | 59.34(6) |
| O2#1—Co1—O3#2 | 98.41(7)  |               |          |

Symmetry codes for #1  $-x+1, -y+1, -z+1$ ; #2  $x-1, y-1, z$ ; #3  $-x+2, -y+2, -z+2$ ; #4  $x+1, y+1, z$ .

---
